# Supplementary material
Source: PubMed Central journal article supplement (PMC2632155)
Supplement: supp_75_3_676__1.pdf [file supp_75_3_676__1.pdf]

Supplementary Table 1

| Normalized to MAP0160 | 16S pre rrn |      | MAP3746 |      | MAP2729 |      | MAP0859c | MAP0101 | MAP0160 |
|-----------------------|-------------|------|---------|------|---------|------|----------|---------|---------|
| Experiment            | 1           | 2    | 1       | 2    | 1       | 2    | 1        | 1       | 2       |
| 841                   | 2.39        | 2.17 | 2.68    | 2.77 | 2.33    | 1.73 | 2.03     | 1.18    | 1.00    |
| CAM86 Large colony    | 4.09        | 2.28 | 1.43    | 1.53 | 1.48    | 0.87 | 1.05     | 0.64    | 1.00    |
| CAM86 Small colony    | 2.23        | 2.14 | 0.53    | 0.64 | 0.43    | 0.46 | 0.41     | 0.50    | 1.00    |
| CAM87                 | 1.23        | 1.15 | 0.61    | 1.42 | 0.33    | 0.43 | 0.62     | 0.56    | 1.00    |
|                       |             |      |         |      |         |      |          |         |         |
| 456 Large colony      | 0.85        | 0.77 | 0.63    | 1.21 | 0.52    | 0.71 | 0.64     | 0.77    | 1.00    |
| 456 Small colony      | nt          | nt   | nt      | nt   | nt      | nt   | nt       | nt      | nt      |
| CAM63 Large colony    | 1.00        | 1.00 | 1.00    | 1.00 | 1.00    | 1.00 | 1.00     | 1.00    | 1.00    |
| CAM63 Small colony    | nt          | nt   | nt      | nt   | nt      | nt   | nt       | nt      | nt      |
| Vaccine II            | 1.55        | 0.67 | 1.37    | 1.16 | 7.11    | 3.41 | 1.69     | 1.04    | 1.00    |
|                       |             |      |         |      |         |      |          |         |         |
| Normalized to MAP0101 | 16S pre rrn |      | MAP3746 |      | MAP2729 |      | MAP0859c | MAP0101 | MAP0160 |
| Experiment            | 1           | 2    | 1       | 2    | 1       | 2    | 1        | 1       | 2       |
| 841                   | 2.02        | 1.84 | 2.27    | 2.34 | 1.97    | 1.46 | 1.72     | 1.00    | 0.85    |
| CAM86 Large colony    | 6.41        | 3.57 | 2.25    | 2.40 | 2.32    | 1.37 | 1.65     | 1.00    | 1.57    |
| CAM86 Small colony    | 4.44        | 4.25 | 1.05    | 1.27 | 0.86    | 0.90 | 0.81     | 1.00    | 1.99    |
| CAM87                 | 2.18        | 2.03 | 1.09    | 2.51 | 0.58    | 0.76 | 1.10     | 1.00    | 1.77    |
|                       |             |      |         |      |         |      |          |         |         |
| 456 Large colony      | 1.11        | 1.00 | 0.82    | 1.58 | 0.68    | 0.92 | 0.83     | 1.00    | 1.30    |
| 456 Small colony      | 1.32        | nt   | 1.12    | nt   | 0.67    | nt   | 1.01     | 1.00    | nt      |
| CAM63 Large colony    | 1.00        | 1.00 | 1.00    | 1.00 | 1.00    | 1.00 | 1.00     | 1.00    | 1.00    |
| CAM63 Small colony    | 0.91        | nt   | 1.00    | nt   | 1.31    | nt   | 1.10     | 1.00    | nt      |
| Vaccine II            | 1.49        | 0.64 | 1.32    | 1.12 | 6.85    | 3.28 | 1.62     | 1.00    | 0.96    |

nt = not tested
