# Supplementary material
Source: PubMed Central journal article supplement (PMC2632155)
Supplement: supp_75_3_676__2.pdf [file supp_75_3_676__2.pdf]

| INDELS | GeneID                    | Synonyms                         | Position | MAH104 (-) | CAM84 (I) | 896 (I) | CAM20 (II) | 574 (II) | 67608 (I) | M189 (I) | 213G (I) | 619 (III) | CAM87 (III) | CAM86 (III) | CAM38 (III)          | 841 (III)            | MapK10 Product                                    | Maa104 Product                                                     |                      |
|--------|---------------------------|----------------------------------|----------|------------|-----------|---------|------------|----------|-----------|----------|----------|-----------|-------------|-------------|----------------------|----------------------|---------------------------------------------------|--------------------------------------------------------------------|----------------------|
|        | MapK10-0028c (1B4)        | MAP0028c:MAV_1453:MAA1951        | 30       | 1.37       | 0.66      | 0.86    | 0.91       | 0.80     | 0.85      | 0.77     | 1.33     | 2.63      | 1.21        | 1.22        | hypothetical protein |                      | transposase                                       |                                                                    |                      |
|        | MapK10-0036 (1B2)         | MAP0036:MAV_0042:MAA3298         | 40       | 0.83       | 1.23      | 0.99    | 0.83       | 0.42     | 1.80      | 1.09     | 1.09     | 1.07      | 1.10        | 1.15        | 0.98                 | hypothetical protein | NLP/Pf0 family protein                            |                                                                    |                      |
|        | MapK10-0066 (1C18)        | MAP0066:MAV_0073:MAA3208         | 71       | 0.93       | 0.99      | 1.04    | 0.82       | 0.40     | 1.16      | 1.41     | 1.04     | 1.01      | 1.09        | 1.12        | hypothetical protein |                      | DJ-1/PfpJ family protein                          |                                                                    |                      |
|        | MapK10-0071 (1C23)        | chbB:MAP0071:MAV_0079:MAA3203    | 76       | 1.29       | 0.78      | 0.94    | 1.02       | 0.85     | 0.82      | 0.60     | 0.98     | 1.64      | 3.72        | 1.77        | 1.16                 | 1.16                 | DnaB                                              | replicative DNA helicase                                           |                      |
|        | MapK10-0072c (1C24)       | MAP0072c:MAV_0080:MAA3202        | 77       | 1.25       | 0.93      | 0.82    | 1.02       | 0.81     | 0.87      | 0.89     | 3.43     | 1.86      | 1.18        | 1.14        | hypothetical protein |                      | hypothetical protein                              |                                                                    |                      |
|        | MapK10-0073c (1D1)        | MAP0073c:MAV_0081:MAA3201        | 78       | 1.15       | 0.86      | 0.98    | 0.91       | 0.73     | 0.78      | 0.82     | 2.87     | 1.73      | 1.38        | 1.29        | hypothetical protein |                      | hypothetical protein                              |                                                                    |                      |
|        | MapK10-0074 (1D2)         | MAP0074:MAV_0082:MAA3200         | 79       | 1.13       | 0.86      | 1.02    | 0.92       | 1.04     | 1.02      | 1.04     | 2.91     | 1.57      | 1.00        | 0.96        | hypothetical protein |                      | transcriptional regulator, TetR family protein    |                                                                    |                      |
|        | MapK10-0075 (1D3)         | MAP0075:MAV_0083:MAA3199         | 80       | 1.14       | 0.71      | 1.16    | 1.02       | 0.47     | 0.66      | 1.07     | 3.03     | 1.83      | 1.25        | 1.44        | hypothetical protein |                      | hypothetical protein                              |                                                                    |                      |
|        | MapK10-0076 (1D4)         | rrmL4_1:MAP0076:MAV_0084:MAA3198 | 81       | 1.18       | 0.60      | 0.88    | 0.87       | 0.73     | 0.83      | 1.08     | 2.74     | 1.50      | 1.73        | 1.50        | 1.07                 | WmpL4_1              | putative transport protein MmpL4                  |                                                                    |                      |
|        | MapK10-0077 (1D5)         | MAP0077:MAV_0085:MAA3197         | 82       | 1.20       | 0.66      | 0.92    | 1.13       | 0.60     | 0.63      | 1.40     | 1.10     | 1.39      | 0.99        | 0.87        | hypothetical protein |                      | hypothetical protein                              |                                                                    |                      |
|        | MapK10-0078 (1D6)         | MAP0078:MAV_0086:MAA3196         | 83       | 1.31       | 0.81      | 1.03    | 1.04       | 0.54     | 0.75      | 0.84     | 0.68     | 2.06      | 1.37        | 1.00        | hypothetical protein |                      | hypothetical protein                              |                                                                    |                      |
|        | MapK10-0079 (1D7)         | MAP0079:MAV_0087:MAA3195         | 84       | 1.20       | 0.83      | 1.04    | 0.87       | 0.66     | 0.96      | 1.41     | 1.32     | 2.85      | 1.60        | 0.81        | 1.11                 | hypothetical protein |                                                   | oxidoreductase, short chain dehydrogenase/reductase family protein |                      |
|        | MapK10-0080c (1D8)        | MAP0080c:MAV_0088:MAA3194        | 85       | 1.08       | 0.82      | 0.96    | 1.41       | 0.54     | 0.59      | 0.90     | 1.08     | 1.24      | 3.27        | 1.58        | 1.18                 | 1.17                 | hypothetical protein                              | hypothetical protein                                               |                      |
|        | MapK10-0081 (1D9)         | MAP0081:MAV_0089:MAA3193         | 86       | 1.13       | 0.92      | 1.16    | 0.97       | 0.78     | 0.68      | 1.05     | 3.32     | 1.65      | 1.30        | 1.19        | hypothetical protein |                      | FAD binding domain protein                        |                                                                    |                      |
|        | MapK10-0082 (1D10)        | MAP0082:MAV_0092:MAA3192         | 87       | 0.99       | 0.92      | 1.13    | 0.76       | 0.35     | 1.41      | 1.13     | 2.87     | 1.47      | 1.04        | 0.75        | hypothetical protein |                      | transcriptional regulator, Crp/Fnr family protein |                                                                    |                      |
|        | MapK10-0083c (1D11)       | MAP0083c:MAV_0091:MAA3191        | 88       | 1.27       | 0.87      | 0.91    | 0.97       | 1.02     | 1.12      | 0.88     | 2.54     | 1.67      | 0.98        | 0.88        | hypothetical protein |                      | hypothetical protein                              |                                                                    |                      |
|        | MapK10-0084c (1D12)       | MAP0084c:MAV_0093:MAA3190        | 89       | 1.12       | 0.97      | 0.86    | 0.90       | 0.82     | 0.88      | 0.77     | 2.33     | 1.51      | 1.02        | 1.10        | hypothetical protein |                      | hypothetical protein                              |                                                                    |                      |
|        | MapK10-0085c (1D13)       | lysR:MAP0085c:MAV_0094:MAA3189   | 90       | 1.06       | 0.87      | 1.10    | 0.99       | 0.90     | 0.85      | 1.08     | 2.82     | 1.35      | 1.10        | 0.98        | LysR                 |                      | integral membrane protein DUF6                    |                                                                    |                      |
|        | MapK10-0086 (1D14)        | MAP0086:MAV_0095:MAA3188         | 91       | 0.99       | 0.89      | 0.99    | 0.95       | 0.54     | 0.82      | 0.86     | 0.88     | 0.92      | 2.46        | 1.37        | 1.05                 | 1.11                 | hypothetical protein                              |                                                                    | hypothetical protein |
|        | MapK10-0087 (1D15)        | MAP0087                          | 92       | 0.39       | 1.24      | 0.78    | 1.06       | 0.51     | 0.74      | 0.56     | 0.78     | 1.30      | 3.07        | 1.55        | 1.01                 | 1.04                 | hypothetical protein                              |                                                                    | hypothetical protein |
|        | MapK10-0088 (1D16)        | MAP0088:MAV_0096:MAA3187         | 93       | 0.97       | 0.86      | 0.91    | 1.00       | 0.73     | 0.77      | 0.72     | 0.78     | 1.27      | 3.69        | 1.94        | 1.09                 | 1.12                 | hypothetical protein                              |                                                                    | hypothetical protein |
|        | MapK10-0089 (1D17)        | MAP0089:MAV_0097:MAA3187         | 94       | 1.12       | 0.85      | 0.98    | 1.02       | 1.07     | 1.07      | 1.11     | 4.05     | 1.74      | 1.16        | 1.18        | hypothetical protein |                      | phosphothioicin N-acetyltransferase               |                                                                    |                      |
|        | MapK10-0090c (1D18)       | MAP0090c:MAV_0098:MAA3186        | 95       | 1.02       | 0.73      | 0.96    | 0.91       | 0.69     | 0.92      | 1.37     | 3.09     | 1.96      | 1.04        | 1.00        | hypothetical protein |                      | hypothetical protein                              |                                                                    |                      |
|        | MapK10-0091c (1D19)       | MAP0091c:MAA3185                 | 96       | 1.48       | 0.75      | 1.19    | 1.11       | 0.70     | 0.70      | 0.62     | 2.99     | 1.23      | 1.15        | 1.12        | hypothetical protein |                      | hypothetical protein                              |                                                                    |                      |
|        | MapK10-0092 (1D20)        | MAP0092:MAV_0100:MAA3184         | 97       | 1.10       | 0.80      | 0.96    | 0.97       | 0.74     | 0.77      | 0.94     | 2.82     | 1.60      | 0.97        | 1.12        | hypothetical protein |                      | hypothetical protein                              |                                                                    |                      |
|        | MapK10-0093 (1D21)        | MAP0093:MAA3183                  | 98       | 1.09       | 0.72      | 0.81    | 0.88       | 0.70     | 0.69      | 1.00     | 3.01     | 1.85      | 1.23        | 1.23        | hypothetical protein |                      | hypothetical protein                              |                                                                    |                      |
|        | MapK10-0094 (1D22)        | MAP0094                          | 99       | 0.14       | 0.78      | 0.90    | 1.14       | 0.56     | 0.94      | 1.00     | 1.24     | 3.34      | 1.71        | 1.04        | 1.03                 | hypothetical protein |                                                   | hypothetical protein                                               |                      |
|        | MapK10-0095c (1D23)       | nucl_1:MAP0095c                  | 100      | 0.12       | 0.64      | 0.80    | 1.05       | 0.82     | 0.75      | 0.69     | 1.00     | 2.77      | 1.77        | 1.09        | 0.90                 | 1.00                 | NADH dehydrogenase subunit I                      |                                                                    |                      |
|        | MapK10-0096c (1D24)       | MAP0096c                         | 101      | 0.09       | 0.81      | 0.90    | 1.11       | 0.83     | 0.76      | 0.57     | 0.92     | 1.29      | 3.33        | 1.82        | 1.19                 | 1.00                 | hypothetical protein                              |                                                                    | hypothetical protein |
|        | MapK10-0097c (1E1)        | MAP0097c                         | 102      | 0.05       | 0.85      | 0.89    | 0.82       | 0.75     | 0.81      | 0.94     | 3.34     | 1.89      | 1.12        | 1.14        | hypothetical protein |                      | hypothetical protein                              |                                                                    |                      |
|        | MapK10-0098c (1E2)        | MAP0098c                         | 103      | 0.03       | 0.73      | 0.87    | 0.87       | 0.69     | 0.68      | 0.83     | 3.42     | 1.80      | 1.00        | 1.04        | hypothetical protein |                      | hypothetical protein                              |                                                                    |                      |
|        | MapK10-0099 (1E3)         | MAP0099                          | 104      | 0.05       | 0.95      | 0.85    | 0.88       | 0.55     | 0.55      | 0.52     | 1.57     | 1.01      | 0.98        | 0.98        | hypothetical protein |                      | hypothetical protein                              |                                                                    |                      |
|        | MapK10-0100 (1E4)         | MAP0100                          | 105      | 0.05       | 0.68      | 0.84    | 0.81       | 0.70     | 0.81      | 0.80     | 3.21     | 1.74      | 1.14        | 1.06        | hypothetical protein |                      | hypothetical protein                              |                                                                    |                      |
|        | MapK10-0101 (1E5)         | MAP0101                          | 106      | 0.11       | 0.70      | 0.89    | 0.97       | 0.64     | 0.65      | 0.59     | 2.74     | 1.49      | 0.93        | 0.96        | hypothetical protein |                      | hypothetical protein                              |                                                                    |                      |
|        | MapK10-0102 (1E6)         | MAP0102                          | 107      | 0.08       | 0.67      | 0.88    | 0.91       | 0.67     | 0.81      | 1.06     | 2.70     | 1.81      | 1.52        | 1.02        | 1.01                 | 0.91                 | hypothetical protein                              |                                                                    | hypothetical protein |
|        | MapK10-0103c (1E7)        | MAP0103c                         | 108      | 0.17       | 0.71      | 0.80    | 0.90       | 0.63     | 0.65      | 0.63     | 0.82     | 1.35      | 3.48        | 1.60        | 1.11                 | 1.07                 | hypothetical protein                              |                                                                    | hypothetical protein |
|        | MapK10-0124 (1F4)         | MAP0124:MAA3166                  | 130      | 0.95       | 1.20      | 1.14    | 0.83       | 0.41     | 1.81      | 1.17     | 0.89     | 0.85      | 1.01        | 0.93        | hypothetical protein |                      | hypothetical protein                              |                                                                    |                      |
|        | MapK10-0128c (1F8)        | MAP0128c:MAV_0122:MAA3162        | 134      | 1.06       | 0.96      | 0.90    | 1.03       | 0.78     | 0.85      | 0.91     | 0.28     | 0.86      | 0.93        | 0.96        | 1.10                 | hypothetical protein |                                                   | hypothetical protein                                               |                      |
|        | MapK10-0148c (1G4)        | MAP0148c:MAA3142                 | 155      | 1.11       | 0.87      | 1.19    | 1.10       | 1.42     | 1.18      | 1.12     | 1.00     | 1.09      | 1.68        | 1.06        | hypothetical protein |                      | hypothetical protein                              |                                                                    |                      |
|        | MapK10-0168c (1G24)       | MAP0168c:MAV_0161:MAA3125        | 175      | 1.00       | 0.91      | 1.04    | 0.94       | 0.39     | 1.99      | 1.42     | 0.77     | 1.13      | 0.90        | 0.73        | hypothetical protein |                      | hypothetical protein                              |                                                                    |                      |
|        | MapK10-0174 (1H6)         | MAP0174:MAV_0168:MAA3120         | 181      | 1.03       | 0.93      | 1.12    | 1.16       | 0.29     | 1.04      | 1.11     | 0.48     | 0.90      | 0.92        | 0.99        | hypothetical protein |                      | hypothetical protein                              |                                                                    |                      |
|        | MapK10-0210c (1H19)       | pirC:MAP0210c:MAV_0207:MAA3084   | 220      | 1.09       | 1.04      | 0.95    | 2.16       | 1.03     | 1.42      | 1.24     | 1.02     | 0.89      | 0.97        | 1.00        | PirG                 |                      | Erp protein                                       |                                                                    |                      |
|        | MapK10-0253 (1K14)        | MAP0253                          | 286      | 0.90       | 0.66      | 0.90    | 0.42       | 0.62     | 0.68      | 0.91     | 1.52     | 1.10      | 1.02        | 1.13        | hypothetical protein |                      | hypothetical protein                              |                                                                    |                      |
|        | Maa104-0258 (14H8)        | MAV_0258:MAA3036                 | 271      | 5.40       |           |         | 0.74       |          |           |          | 0.22     |           |             |             |                      |                      | hypothetical protein                              |                                                                    |                      |
|        | Maa104-0259 (14H7)        | MAV_0259:MAA3035                 | 272      | 27.98      |           | 0.72    | 0.85       |          |           |          | 0.39     | 0.94      |             | 1.28        | 0.64                 |                      | hypothetical protein                              |                                                                    |                      |
|        | Maa104-0261 (14H6)        | MAV_0260:MAA3034                 | 273      | 12.73      |           |         |            |          |           |          | 8.60     |           |             |             |                      |                      | hypothetical protein                              |                                                                    |                      |
|        | Maa104-0261 (14H5)        | MAV_0261:MAA3033                 | 274      | 35.22      |           |         |            |          |           |          | 13.76    |           |             |             |                      |                      | hypothetical protein                              |                                                                    |                      |
|        | Maa104-0270 (14H8)        | MAV_0270:MAA3024                 | 283      | 3.00       | 0.60      | 1.01    | 1.35       | 1.01     | 0.36      | 0.72     | 0.97     | 0.93      | 0.73        | 0.75        | 0.78                 | 0.80                 | acetyltransferase, gnat family protein            |                                                                    |                      |
|        | Maa104-0295 (14H10)       | MAV_0295:MAA3004                 | 303      | 14.23      |           |         | 1.14       |          |           |          | 0.35     |           |             |             |                      |                      | hypothetical protein                              |                                                                    |                      |
|        | MapK10-0281 (1L18)        | MAP0281:MAV_0327:MAA2974         | 335      | 1.04       | 0.71      | 0.80    | 0.35       | 0.46     | 0.91      | 1.13     | 3.32     | 1.74      | 1.21        | 1.05        | hypothetical protein |                      | hypothetical protein                              |                                                                    |                      |
|        | MapK10-0282c (1L19)       | MAP0282c                         | 336      | 0.13       | 0.69      | 0.84    | 0.91       | 0.53     | 0.52      | 0.89     | 3.32     | 1.57      | 1.26        | 1.05        | hypothetical protein |                      | hypothetical protein                              |                                                                    |                      |
|        | MapK10-0282c-0283c (1L20) | MAP0282c-0283c                   | 337      | 0.18       | 0.71      | 0.83    | 0.92       | 0.60     | 0.72      | 0.82     | 3.33     | 1.60      | 1.03        | 1.12        |                      |                      | hypothetical protein                              |                                                                    |                      |
|        | MapK10-0330 (14H3)        | MAV_0330:MAA2970                 | 342      | 11.85      |           | 2.61    |            |          |           |          |          |           |             |             |                      |                      | hypothetical protein                              |                                                                    |                      |
|        | Maa104-0331 (14H2)        | MAV_0331:MAA2869                 | 343      | 6.07       |           |         |            |          |           |          | 0.33     |           |             |             |                      |                      | hypothetical protein                              |                                                                    |                      |
|        | INDEL1                    | Maa104-0339 (14G23)              | 352      | 2.04       |           |         | 0.44       | 10.29    | 14.81     | 18.48    | 9.97     | 10.00     | 12.18       | 9.22        | 6.79                 |                      | transcriptional regulator, GmrR family protein    |                                                                    |                      |
|        | MapK10-0362c (1P5)        | MAP0362c:MAV_0415:MAA2893        | 428      | 1.04       | 1.02      | 0.92    | 0.79       | 0.33     | 1.08      | 1.12     | 0.98     | 0.98      | 0.99        | 1.07        | 0.89                 | hypothetical protein |                                                   | hypothetical protein                                               |                      |
|        | MapK10-0363 (1P6)         | MAP0363:MAV_0416:MAA2892         | 429      | 0.96       | 1.01      | 1.04    | 1.05       | 0.36     | 1.77      | 1.30     | 0.28     | 0.83      | 1.02        | 1.07        | 0.97                 | hypothetical protein |                                                   | GaB/Yey domain protein                                             |                      |
|        | MapK10-0415 (2B10)        | MAP0415:MAV_0470:MAA2948         | 483      |            |           |         | 0.92       | 0.22     | 0.57      | 0.65     |          |           |             |             |                      |                      | hypothetical protein                              |                                                                    |                      |
|        | Maa104-0485 (14G6)        | MAV_0485:MAA2834                 | 496      | 20.28      | 2.61      |         | 0.75       |          |           |          |          |           |             |             |                      |                      | hypothetical protein                              |                                                                    |                      |
|        | MapK10-0486c (2E9)        | MAP0486c:MAV_0580:MAA2752        | 588      |            |           |         | 0.89       | 0.81     | 0.38      | 0.86     | 1.09     |           |             |             |                      |                      | Lamb/YcsF family protein                          |                                                                    |                      |
|        | MapK10-0538c (2G13)       | MAP0538c:MAV_0632:MAA2700        | 641      | 0.80       | 0.94      | 1.03    | 0.66       | 0.91     | 0.38      | 0.99     | 1.55     | 0.58      | 1.47        | 1.05        | 1.09                 | 0.73                 | hypothetical protein                              |                                                                    |                      |
|        | Maa104-0690 (14E23)       | MAV_0690:MAA2647                 | 700      | 9.76       |           | 0.69    |            |          |           |          |          |           |             |             |                      |                      | hypothetical protein                              |                                                                    |                      |
|        | Maa104-0697 (             |                                  |          |            |           |         |            |          |           |          |          |           |             |             |                      |                      |                                                   |                                                                    |                      |

|  |                         |                               |       |       |      |      |       |       |       |       |       |       |       |       |                      |                                                                  |                                                                                  |                                                                                      |
|--|-------------------------|-------------------------------|-------|-------|------|------|-------|-------|-------|-------|-------|-------|-------|-------|----------------------|------------------------------------------------------------------|----------------------------------------------------------------------------------|--------------------------------------------------------------------------------------|
|  | MapK10-0861 (3E3)       | MAP0861                       | 1,053 | 0.57  | 0.73 | 1.42 | 0.24  | 0.51  | 0.51  | 1.23  | 2.99  | 1.64  | 1.05  | 1.10  | hypothetical protein |                                                                  |                                                                                  |                                                                                      |
|  | MapK10-0862 (3E4)       | MAP0862                       | 1,054 | 0.15  | 0.65 | 0.73 | 1.36  | 1.34  | 0.65  | 0.58  | 0.82  | 1.57  | 4.37  | 1.67  | 1.01                 | 1.11                                                             | hypothetical protein                                                             |                                                                                      |
|  | MapK10-0863 (3E5)       | MAP0863                       | 1,055 | 0.63  | 0.68 | 0.81 | 1.29  | 0.92  | 0.66  | 0.74  | 1.51  | 3.80  | 1.76  | 1.25  | 1.21                 | EpA                                                              |                                                                                  |                                                                                      |
|  | MapK10-0864 (3E6)       | MAP0864                       | 1,056 | 0.03  | 0.63 | 0.84 | 0.85  | 0.89  | 0.70  | 0.55  | 0.81  | 1.39  | 3.61  | 1.90  | 1.05                 | 1.10                                                             | hypothetical protein                                                             |                                                                                      |
|  | MapK10-0865 (3E7)       | MAP0865                       | 1,057 | 0.03  | 0.63 | 0.75 | 0.86  | 0.90  | 0.67  | 0.53  | 0.71  | 1.07  | 4.25  | 1.82  | 1.09                 | 1.12                                                             | hypothetical protein                                                             |                                                                                      |
|  | MapK10-0865-0866 (3E8)  | MAP0865-0866                  | 1,058 | 0.10  | 0.64 | 0.93 | 0.90  | 0.82  | 0.80  | 0.68  | 0.73  | 0.98  | 3.31  | 1.90  | 1.05                 | 1.18                                                             |                                                                                  |                                                                                      |
|  | MapK10-0866 (3E9)       | MAP0866                       | 1,059 | 0.09  | 0.67 | 0.89 | 0.99  | 0.79  | 0.78  | 0.78  | 0.78  | 0.94  | 1.74  | 1.11  | 1.11                 | hypothetical protein                                             |                                                                                  |                                                                                      |
|  | MapK10-1036 (3L12)      | rvuC:MAP1036:MAV_3475:MAA0084 | 1,244 | 0.78  | 0.85 | 1.58 | 0.84  | 0.74  | 1.09  | 1.35  | 0.26  | 0.99  | 1.50  | 1.07  | 1.01                 | Holliday junction resolvase crossover junction endonuclease RuvC |                                                                                  |                                                                                      |
|  | MapK10-3459 (12M)       | MAV_3459:MAA0099              | 1,261 | 2.16  | 2.46 |      | 0.79  |       |       |       |       |       |       |       | hypothetical protein |                                                                  |                                                                                  |                                                                                      |
|  | MapK10-3380 (12I0)      | MAV_3380:MAA0172              | 1,342 | 1.93  |      |      | 1.32  |       |       | 5.53  |       |       |       |       | hypothetical protein |                                                                  |                                                                                  |                                                                                      |
|  | MapK10-3379 (12I1)      | MAV_3379:MAA0173              | 1,343 | 2.14  | 0.82 | 0.90 | 1.45  | 1.09  | 0.16  | 0.23  | 0.18  | 0.56  | 0.40  | 0.28  | 0.25                 | 1.74                                                             | AnsC-family protein transcriptional regulator MntJ protein                       |                                                                                      |
|  | MapK10-1230-1231 (4D16) | MAP1230-1231                  | 1,453 | 0.23  | 0.66 | 0.88 | 1.24  | 1.34  | 1.04  | 0.69  | 0.89  | 1.69  | 4.72  | 2.63  | 1.47                 | 1.51                                                             |                                                                                  |                                                                                      |
|  | MapK10-1231 (4D17)      | gmaA:MAP1231                  | 1,454 | 0.15  | 0.72 | 0.81 | 1.02  | 1.34  | 0.85  | 0.59  | 0.85  | 3.88  | 1.83  | 1.24  | 1.20                 | GmdA                                                             |                                                                                  |                                                                                      |
|  | MapK10-1232 (4D18)      | epaA:MAP1232                  | 1,455 | 0.08  | 0.67 | 0.83 | 0.99  | 1.92  | 0.75  | 0.51  | 0.83  | 3.85  | 1.76  | 1.25  | 1.14                 | hypothetical protein                                             |                                                                                  |                                                                                      |
|  | MapK10-1233 (4D19)      | MAP1233                       | 1,456 | 0.22  | 0.66 | 0.85 | 0.90  | 2.30  | 0.57  | 0.63  | 0.95  | 1.83  | 5.06  | 1.46  | 1.38                 | 1.07                                                             | hypothetical protein                                                             |                                                                                      |
|  | MapK10-1234 (4D20)      | MAP1234                       | 1,457 | 0.24  | 0.72 | 0.70 | 0.91  | 1.32  | 0.57  | 0.53  | 0.72  | 1.42  | 3.70  | 1.63  | 1.14                 | 1.23                                                             | hypothetical protein                                                             |                                                                                      |
|  | MapK10-1235 (4D21)      | MAP1235                       | 1,458 | 0.44  | 0.61 | 0.89 | 0.84  | 1.24  | 0.59  | 0.58  | 0.80  | 1.75  | 4.74  | 1.62  | 1.37                 | 1.24                                                             | hypothetical protein                                                             |                                                                                      |
|  | MapK10-1236 (4D22)      | trc:MAP1236c                  | 1,459 | 0.49  | 0.68 | 1.07 | 0.60  | 0.71  | 0.48  | 0.82  | 1.35  | 3.85  | 1.52  | 1.26  | 1.22                 | Dtrc                                                             |                                                                                  |                                                                                      |
|  | MapK10-3270 (12I9)      | MAV_3270:MAA0277              | 1,462 | 7.61  | 0.78 | 0.74 | 0.78  | 1.09  | 7.27  | 8.55  | 12.23 | 9.09  | 7.54  | 4.41  | 5.91                 | 4.27                                                             | hypothetical protein                                                             |                                                                                      |
|  | MapK10-3269 (12I0)      | MAV_3269:MAA0278              | 1,463 | 13.25 |      | 0.69 | 11.67 | 17.53 | 21.76 | 28.50 | 11.22 | 12.08 | 9.48  | 6.56  |                      |                                                                  | NAD dependent epimerase/dehydratase family protein                               |                                                                                      |
|  | MapK10-3268 (12I1)      | MAV_3268:MAA0280              | 1,465 | 13.00 |      | 0.65 | 23.01 | 20.74 | 35.81 | 43.60 | 21.42 | 17.43 | 12.52 | 11.71 |                      |                                                                  | MtB protein                                                                      |                                                                                      |
|  | MapK10-3265 (12I2)      | MAV_3265:MAA0281              | 1,466 | 10.29 |      | 0.46 | 10.14 | 12.96 | 14.52 | 21.28 | 12.05 | 12.35 | 8.38  | 6.82  |                      |                                                                  | hypothetical glycosyl transferase                                                |                                                                                      |
|  | MapK10-3262 (12I3)      | MAV_3262:MAA0284              | 1,469 | 16.56 |      | 0.71 | 19.96 | 27.06 | 26.63 | 10.76 | 23.46 | 19.58 | 14.82 | 12.49 |                      |                                                                  | hypothetical glycosyl transferase                                                |                                                                                      |
|  | MapK10-3261 (12I4)      | MAV_3261:MAA0285              | 1,470 | 18.26 |      | 0.55 | 25.25 | 17.16 | 20.19 | 20.19 | 16.21 | 14.69 | 11.40 | 8.62  |                      |                                                                  | methyltransferase MfC                                                            |                                                                                      |
|  | MapK10-3260 (12I5)      | MAV_3260:MAA0286              | 1,471 | 21.60 |      | 0.67 | 20.85 | 19.55 | 26.74 | 32.11 | 19.16 | 18.87 | 12.51 | 10.22 |                      |                                                                  | MfD protein                                                                      |                                                                                      |
|  | MapK10-3259 (12I6)      | MAV_3259:MAA0287              | 1,472 | 10.93 | 1.19 | 1.06 | 10.07 | 9.97  | 6.93  | 7.69  | 5.43  | 9.25  | 4.95  | 4.70  | 4.06                 |                                                                  | dehydrogenase DhgA                                                               |                                                                                      |
|  | MapK10-3258 (12I7)      | MAV_3258:MAA0288              | 1,473 | 10.64 |      | 1.07 | 15.39 | 16.03 | 21.58 | 51.19 | 17.70 | 14.54 | 11.19 | 10.69 |                      |                                                                  | glycosyltransferase family protein 28                                            |                                                                                      |
|  | MapK10-3252 (12I12)     | MAV_3252:MAA0294              | 1,479 | 5.58  |      | 0.75 | 10.26 |       |       |       |       |       |       |       |                      |                                                                  | daunorubicin resistance protein C                                                |                                                                                      |
|  | MapK10-1237 (4D23)      | MAP1237:MAV_3251:MAA0294      | 1,480 | 0.80  | 0.78 | 0.90 | 1.17  | 0.79  | 0.91  | 0.55  | 0.78  | 1.29  | 3.00  | 1.44  | 0.99                 | 1.10                                                             | DrtB                                                                             |                                                                                      |
|  | MapK10-1258c (4E21)     | MAP1258c:MAV_3223:MAA0322     | 1,509 | 0.80  | 1.19 | 1.12 | 3.07  | 1.00  | 1.68  | 1.12  | 1.27  | 0.91  | 0.89  | 0.89  | 0.88                 | 0.96                                                             | hypothetical protein                                                             |                                                                                      |
|  | MapK10-3132 (12K1)      | MAV_3132:MAA0409              | 1,605 | 1.51  |      |      |       |       |       | 7.14  |       |       |       |       |                      |                                                                  | GGDEF domain protein                                                             |                                                                                      |
|  | MapK10-3096 (12K5)      | MAV_3096:MAA0482              | 1,682 | 1.67  | 0.93 | 0.94 | 0.89  |       | 0.25  | 0.27  | 0.23  | 0.55  | 0.32  | 0.35  | 0.30                 |                                                                  | linear gamma-irradiation sensitive subunit D transposase, Mutator family protein |                                                                                      |
|  | MapK10-3098 (12K10)     | MAV_3098:MAA0500              | 1,700 | 6.17  |      |      |       |       |       |       |       |       |       |       |                      |                                                                  |                                                                                  |                                                                                      |
|  | MapK10-1433c (4M5)      | MAP1433c:MAV_3039:MAA0499     | 1,699 | 1.15  | 0.88 | 0.99 | 1.01  | 0.96  | 0.99  | 0.97  | 0.81  | 0.34  | 0.17  | 0.33  | 0.18                 | 0.24                                                             | 3-ketosteroid-delta-1-dihydro-3-ketosteroid-delta-1-dihydrogenase                |                                                                                      |
|  | MapK10-1434 (4M6)       | MAP1434:MAV_3037:MAA0501      | 1,701 | 1.13  | 0.76 | 0.91 | 1.17  | 0.96  | 1.08  | 0.75  | 0.96  | 0.24  | 0.16  | 0.17  | 0.13                 | 0.16                                                             | hypothetical protein                                                             |                                                                                      |
|  | MapK10-1435 (4M7)       | MAP1435:MAV_3035:MAA0502      | 1,702 | 1.24  | 0.84 | 1.13 | 0.94  | 1.10  | 1.02  | 0.79  | 0.92  | 0.22  | 0.09  | 0.16  | 0.10                 | 0.16                                                             | hypothetical protein                                                             |                                                                                      |
|  | MapK10-1436c (4M8)      | MAP1436c:MAV_3034:MAA0503     | 1,703 | 0.73  | 0.94 | 0.84 | 1.26  | 1.05  | 1.01  | 0.92  | 1.07  | 0.13  | 0.06  | 0.05  | 0.09                 | 0.09                                                             | hypothetical protein                                                             |                                                                                      |
|  | MapK10-1437c (4M9)      | MAP1437c:MAV_3033:MAA0504     | 1,704 | 0.95  | 0.71 | 1.05 | 0.96  | 0.88  | 0.63  | 0.78  | 0.86  | 0.06  | 0.10  | 0.06  | 0.10                 | 0.06                                                             | hypothetical protein                                                             |                                                                                      |
|  | MapK10-1438c (4M10)     | MAP1438c:MAV_3032:MAA0505     | 1,705 | 0.92  | 0.90 | 0.96 | 0.97  | 1.25  | 0.89  | 0.71  | 0.81  | 0.22  | 0.10  | 0.14  | 0.06                 | 0.13                                                             | LpH                                                                              |                                                                                      |
|  | MapK10-2986 (12K14)     | MAV_2986:MAA0534              | 1,728 | 1.29  |      | 0.86 | 1.24  | 1.06  | 3.01  | 2.98  | 2.98  | 2.98  | 2.98  | 2.98  | 2.98                 | 2.98                                                             | 2.98                                                                             | hypothetical protein                                                                 |
|  | MapK10-2987 (12K15)     | MAV_2987:MAA0535              | 1,740 | 3.14  |      | 1.47 | 1.48  | 1.47  | 7.01  | 18.44 | 16.24 | 8.03  | 5.38  | 7.24  | 5.10                 |                                                                  |                                                                                  | oxidoreductase, Mutator family protein                                               |
|  | MapK10-2986 (12K16)     | MAV_2986:MAA0536              | 1,741 | 5.99  |      | 1.47 | 1.48  | 1.47  | 9.33  | 13.25 | 23.39 | 51.08 | 15.14 | 11.35 | 9.96                 |                                                                  |                                                                                  | lipoprotein                                                                          |
|  | MapK10-2995 (12K17)     | MAV_2995:MAA0537              | 1,742 | 5.09  |      | 0.75 | 13.29 | 14.40 | 19.19 | 5.97  | 15.85 | 11.86 | 8.21  | 6.35  |                      |                                                                  |                                                                                  | adenylate-forming enzyme                                                             |
|  | MapK10-2994 (12K18)     | MAV_2994:MAA0538              | 1,743 | 11.63 |      | 0.75 | 17.44 | 14.44 | 15.38 | 22.46 | 17.44 | 14.44 | 8.65  | 6.78  |                      |                                                                  |                                                                                  | putative class I aldolase                                                            |
|  | MapK10-2993 (12K19)     | MAV_2993:MAA0539              | 1,744 | 1.63  |      | 1.43 | 14.40 | 19.82 | 22.54 | 34.57 | 16.11 | 11.56 | 8.42  | 6.14  |                      |                                                                  |                                                                                  | amidohydrolase 2                                                                     |
|  | MapK10-2992 (12K20)     | MAV_2992:MAA0540              | 1,745 | 14.54 | 0.96 | 0.89 | 0.35  | 11.73 | 10.94 | 13.17 | 11.59 | 11.03 | 9.19  | 6.54  | 5.12                 |                                                                  |                                                                                  | transcriptional regulator, MarR family protein                                       |
|  | MapK10-2991 (12K21)     | MAV_2991:MAA0541              | 1,746 | 16.56 |      | 0.34 | 21.25 | 21.47 | 24.34 | 38.93 | 21.26 | 13.65 | 12.73 | 10.65 |                      |                                                                  |                                                                                  | tetracycline polymerase synthesis O-methyltransferase TcmP                           |
|  | MapK10-2990 (12K22)     | MAV_2990:MAA0542              | 1,747 | 6.04  |      | 0.72 | 19.00 | 26.00 | 45.42 | 26.69 | 14.42 | 16.04 | 16.05 | 16.05 |                      |                                                                  |                                                                                  | oxidoreductase                                                                       |
|  | MapK10-2989 (12K23)     | MAV_2989:MAA0543              | 1,748 | 13.07 |      | 0.32 | 17.64 | 29.92 | 31.40 | 41.34 | 26.18 | 18.19 | 16.26 | 12.29 |                      |                                                                  |                                                                                  | arylsulfatase                                                                        |
|  | MapK10-2988 (12K24)     | MAV_2988:MAA0544              | 1,749 | 12.88 |      | 0.30 | 16.68 | 24.40 | 23.92 | 20.78 | 12.38 | 16.11 | 13.53 | 9.68  |                      |                                                                  |                                                                                  | ubiquinone/ubiquinol biosynthesis methyltransferases                                 |
|  | MapK10-2987 (12K25)     | MAV_2987:MAA0545              | 1,750 | 14.41 | 0.80 | 0.80 | 17.59 | 18.56 | 38.30 | 1.52  | 24.31 | 16.04 | 13.94 | 9.99  |                      |                                                                  |                                                                                  | NAD binding oxidoreductase                                                           |
|  | MapK10-2986 (12L)       | MAV_2986:MAA0546              | 1,751 | 14.98 | 1.12 | 1.12 | 13.57 | 17.44 | 24.44 | 2.87  | 15.71 | 12.72 | 19.72 | 13.73 |                      |                                                                  |                                                                                  | protein export protein SecE, putative transcriptional regulator, TetR family protein |
|  | MapK10-2985 (12L3)      | MAV_2985:MAA0547              | 1,752 | 21.18 | 1.19 | 1.19 | 8.76  | 14.56 | 14.77 | 3.52  | 13.44 | 14.05 | 7.38  | 6.91  |                      |                                                                  |                                                                                  | cytochrome P450                                                                      |
|  | MapK10-2984 (12L4)      | MAV_2984:MAA0548              | 1,753 | 4.32  | 1.04 | 0.94 | 1.16  | 1.09  | 6.27  | 5.68  | 5.66  | 10.51 | 10.11 | 4.52  | 5.39                 | 5.69                                                             |                                                                                  | enoyl-CoA hydratase/isomerase                                                        |
|  | MapK10-2982 (12L5)      | MAV_2982:MAA0549              | 1,754 | 11.65 | 0.82 | 0.82 | 10.54 | 11.55 | 17.54 | 10.54 | 13.17 | 16.34 | 7.77  | 9.01  | 1.55                 |                                                                  |                                                                                  | transcriptional regulator, TetR family protein                                       |
|  | MapK10-2981 (12L6)      | MAV_2981:MAA0550              | 1,755 | 10.04 |      | 1.19 | 9.85  | 9.35  | 14.95 | 22.94 | 11.79 | 6.71  | 8.00  | 7.59  |                      |                                                                  |                                                                                  | calB/cal family protein                                                              |
|  | MapK10-2980 (12L7)      | MAV_2980:MAA0551              | 1,756 | 6.57  |      | 1.19 | 9.45  | 11.65 | 16.14 | 32.48 | 15.25 | 10.37 | 10.01 | 7.57  |                      |                                                                  |                                                                                  | clavulanic acid dehydrogenase                                                        |
|  | MapK10-2979 (12L8)      | MAV_2979:MAA0552              | 1,757 | 4.19  |      | 1.19 | 5.71  | 7.88  | 26.88 | 12.75 | 8.12  | 4.85  | 6.00  | 6.58  |                      |                                                                  |                                                                                  | hypothetical protein                                                                 |
|  | MapK10-2978 (12L9)      | MAV_2978:MAA0553              | 1,758 | 3.29  |      | 1.19 | 4.07  | 6.11  | 16.22 | 4.42  | 6.75  | 3.63  | 4.22  | 3.43  |                      |                                                                  |                                                                                  | transposase, Mutator family protein                                                  |
|  | MapK10-2976 (12L11)     | MAV_2976:MAA0555              | 1,760 | 10.96 | 3.13 | 0.88 | 10.96 |       |       |       |       |       |       |       |                      |                                                                  |                                                                                  | transposase, Mutator family protein                                                  |
|  | MapK10-2973 (12L13)     | MAV_2973:MAA0557              | 1,762 | 9.22  |      | 4.21 |       |       |       |       |       |       |       |       |                      |                                                                  |                                                                                  | transposase, Mutator family protein                                                  |
|  | MapK10-1484-1485 (4O11) | MAP1484-1485                  | 1,782 | 1.00  |      | 0.89 | 0.81  | 0.78  | 0.22  | 0.14  | 0.10  | 0.20  | 0.10  | 0.22  | 0.16                 | 0.20                                                             |                                                                                  |                                                                                      |
|  | MapK10-1484c (4O12)     | MAP1484c:MAV_2952:MAA0577     | 1,783 | 0.98  | 0.95 | 0.96 | 1.07  | 0.82  | 0.27  | 0.14  | 0.10  | 0.29  | 0.11  | 0.20  |                      |                                                                  |                                                                                  |                                                                                      |

|  |                     |                                                           |                                |       |       |      |       |       |       |       |        |       |       |       |       |      |                                                                  |                                                                  |                                                   |
|--|---------------------|-----------------------------------------------------------|--------------------------------|-------|-------|------|-------|-------|-------|-------|--------|-------|-------|-------|-------|------|------------------------------------------------------------------|------------------------------------------------------------------|---------------------------------------------------|
|  | MapK10-1741c (5J13) | MAP1741c:MAV_2507:MAA0993                                 | 2,234                          | 0.95  | 0.97  | 1.00 | 1.00  | 1.10  | 0.11  | 0.07  | 0.04   | 0.13  | 0.07  | 0.11  | 0.08  | 0.08 | hypothetical protein                                             | universal stress protein family protein                          |                                                   |
|  | MapK10-1742c (5J14) | MAP1742c:MAV_2506:MAA0994                                 | 2,235                          | 0.83  | 0.98  | 1.01 | 0.90  | 0.80  | 0.13  | 0.07  | 0.07   | 0.15  | 0.07  | 0.11  | 0.08  | 0.09 | hypothetical protein                                             | universal stress protein family protein                          |                                                   |
|  | MapK10-1743c (5J15) | MAP1743c:MAV_2505:MAA0995                                 | 2,236                          | 0.94  | 1.01  | 0.91 | 0.96  | 0.76  | 0.13  | 0.09  | 0.06   | 0.16  | 0.07  | 0.11  | 0.07  | 0.10 | hypothetical protein                                             | hypothetical protein                                             |                                                   |
|  | MapK10-1744 (5J16)  | MAP1744:MAV_2504:MAA0996                                  | 2,237                          | 0.86  | 0.90  | 1.11 | 1.15  | 1.11  | 0.16  | 0.10  | 0.08   | 0.19  | 0.14  | 0.20  | 0.11  | 0.15 | hypothetical protein                                             | hypothetical protein                                             |                                                   |
|  | Maa104-2674 (12N5)  | MAV_2674:MAA0835                                          | 2,078                          | 14.38 |       |      |       |       |       |       |        | 11.49 |       |       |       |      | hypothetical protein                                             | hypothetical protein                                             |                                                   |
|  | Maa104-2682 (12O3)  | MAV_2682:MAA0887                                          | 2,101                          | 8.35  | 0.97  | 1.09 | 0.75  | 0.54  | 1.50  | 0.90  | 1.00   | 0.99  |       | 0.98  | 0.71  | 0.36 | aromatic ring-opening dehydrogenase, catalytic LigB subunit      | transcriptional regulator, TetR family protein                   |                                                   |
|  | Maa104-2686 (12P9)  | MAV_2686:MAA0882                                          | 2,126                          | 8.04  |       |      |       |       |       |       |        | 0.50  |       |       |       |      | hypothetical protein                                             | hypothetical protein                                             |                                                   |
|  | Maa104-2619 (12P10) | MAV_2619:MAA0889                                          | 2,131                          | 8.55  |       |      |       |       |       |       |        | 0.34  |       |       |       |      | acyl-CoA dehydrogenase domain protein                            | acyl-CoA dehydrogenase domain protein                            |                                                   |
|  | Maa104-2612 (12P16) | MAV_2612:MAA0895                                          | 2,137                          | 85.15 |       |      | 42.38 |       |       |       |        |       |       |       |       |      | diogenase large subunit                                          | diogenase large subunit                                          |                                                   |
|  | Maa104-2609 (12P18) | MAV_2609:MAA0897                                          | 2,138                          | 7.15  | 0.74  | 1.62 | 1.29  |       | 1.23  | 1.41  | 1.35   | 0.48  | 1.31  | 1.09  | 1.13  | 0.96 | enoyl-CoA hydratase/isomerase family protein                     | enoyl-CoA hydratase/isomerase family protein                     |                                                   |
|  | Maa104-2602 (12P24) | MAV_2602:MAA0903                                          | 2,145                          | 38.66 |       |      |       |       |       |       |        | 16.02 |       |       |       |      | putative hydrolase                                               | putative hydrolase                                               |                                                   |
|  | Maa104-2600 (13A2)  | MAV_2600:MAA0905                                          | 2,147                          | 18.27 |       |      | 2.95  |       |       |       |        |       |       |       |       |      | acyl-CoA dehydrogenase                                           | acyl-CoA dehydrogenase                                           |                                                   |
|  | Maa104-2594 (13A8)  | MAV_2594:MAA0911                                          | 2,153                          | 7.95  |       |      |       |       |       |       |        | 3.33  |       |       |       |      | monooxygenase, FAD-binding                                       | monooxygenase, FAD-binding                                       |                                                   |
|  | Maa104-2518 (13D6)  | MAV_2518:MAA0982                                          | 2,223                          | 8.87  |       |      | 13.11 |       |       |       |        |       |       |       |       |      | hypothetical protein                                             | hypothetical protein                                             |                                                   |
|  | MapK10-1771c (5K19) | MAP1771c                                                  | 2,267                          | 0.16  | 0.94  | 1.29 | 0.97  | 1.51  | 2.22  | 1.64  | 2.42   | 1.76  | 2.11  | 3.58  | 0.88  | 1.56 | hypothetical protein                                             | hypothetical protein                                             |                                                   |
|  | MapK10-1781 (5L5)   | bp1MAP1781:MAV_2465:MAA1034                               | 2,277                          | 0.90  | 1.04  | 0.97 | 1.08  | 0.85  | 0.94  | 1.21  | 1.18   | 1.12  | 3.65  | 1.07  | 1.04  | 0.95 | LplI protein                                                     | LplI protein                                                     |                                                   |
|  | MapK10-1782c (5L6)  | MAP1782c:MAV_2464:MAA1035                                 | 2,279                          | 1.00  | 0.79  | 0.94 | 1.02  | 1.04  | 1.17  | 0.61  | 1.09   | 1.09  | 3.51  | 1.65  | 1.12  | 1.01 | hypothetical protein                                             | cytochrome P450 family protein                                   |                                                   |
|  | MapK10-1785 (5L9)   | MAP1785                                                   | 2,282                          | 0.15  | 0.75  | 0.89 | 0.99  | 1.98  | 0.95  | 1.65  | 1.28   |       | 1.16  | 3.38  | 1.26  |      | hypothetical protein                                             | hypothetical protein                                             |                                                   |
|  | MapK10-1788 (5L12)  | MAP1788:MAV_2459:MAA1040                                  | 2,285                          | 1.13  | 0.72  | 0.92 | 0.88  | 1.57  | 0.84  | 0.53  | 0.84   | 1.53  | 3.41  | 1.58  | 1.01  | 1.28 | hypothetical protein                                             | transcriptional regulator, TetR family protein                   |                                                   |
|  | Maa104-2422 (13O22) | MAV_2422:MAA1073                                          | 2,326                          | 2.00  | 0.80  | 0.86 | 1.23  | 0.92  | 1.45  | 1.34  | 1.51   | 2.10  | 4.89  | 3.04  | 1.92  | 1.85 | nitrilase/cyanide hydratase and apolipoprotein N-acyltransferase | nitrilase/cyanide hydratase and apolipoprotein N-acyltransferase |                                                   |
|  | MapK10-1820 (5O20)  | MAP1820:MAV_2417:MAA1075                                  | 2,327                          | 1.61  | 0.87  | 0.82 | 1.32  | 1.25  | 1.17  | 1.19  | 1.12   | 2.02  | 4.17  | 2.31  | 1.41  | 1.55 | hypothetical protein                                             | hypothetical protein                                             |                                                   |
|  | Maa104-2419 (13O23) | MAV_2419:MAA1074                                          | 2,328                          | 2.26  | 0.90  | 1.03 | 1.18  | 0.82  | 1.82  | 1.58  | 1.89   | 2.24  | 4.23  | 2.81  | 1.67  | 1.86 | nitrilase/cyanide hydratase and apolipoprotein N-acyltransferase | nitrilase/cyanide hydratase and apolipoprotein N-acyltransferase |                                                   |
|  | MapK10-1821c (5O21) | MAP1821c:MAV_2421                                         | 2,329                          | 1.18  | 0.75  | 0.86 | 1.25  | 1.23  | 0.71  | 0.84  | 0.92   | 1.38  | 3.61  | 1.68  | 1.11  | 1.15 | hypothetical protein                                             | hypothetical protein                                             |                                                   |
|  | MapK10-1868c (5O22) | efPA_1MAP1868c:MAV_2368:MAA1116                           | 2,380                          | 1.09  | 0.85  | 0.77 | 1.10  | 1.03  | 0.84  | 0.54  | 0.83   | 1.17  | 3.39  | 1.20  | 1.00  | 1.08 | ElpA_1                                                           | transporter, major facilitator family protein                    |                                                   |
|  | MapK10-1868c (5O21) | MAP1868c:MAA1117                                          | 2,381                          | 1.25  | 0.78  | 0.86 | 0.80  | 0.98  | 0.93  | 0.68  | 1.05   | 1.28  | 2.95  | 1.38  | 0.97  | 1.14 | hypothetical protein                                             | hypothetical protein                                             |                                                   |
|  | MapK10-1870c (5O22) | MAP1870c:MAA1117                                          | 2,382                          | 1.18  | 0.80  | 0.92 | 1.16  | 0.80  | 1.07  | 0.90  | 0.92   | 1.05  | 1.63  | 1.03  | 0.95  | 0.86 | hypothetical protein                                             | hypothetical protein                                             |                                                   |
|  | MapK10-1871c (5O23) | MAP1871c:MAV_2367:MAA1118                                 | 2,383                          | 1.33  | 0.70  | 0.82 | 0.91  | 0.81  | 0.84  | 0.52  | 0.69   | 1.11  | 2.74  | 1.37  | 1.14  | 1.03 | hypothetical protein                                             | hypothetical protein                                             |                                                   |
|  | MapK10-1872c (5O24) | mbH_2MAP1872c:MAV_2366:MAA1119                            | 2,384                          | 1.04  | 0.70  | 0.87 | 1.12  | 1.52  | 1.09  | 0.48  | 1.09   | 1.38  | 3.52  | 2.48  | 1.18  | 1.56 | MbHf_2                                                           | hypothetical protein                                             |                                                   |
|  | MapK10-1944c (6S27) | MAP1944c:MAV_2287:MAA1192                                 | 2,458                          | 2.98  | 0.88  | 0.98 | 1.45  | 2.06  | 2.44  | 2.76  | 0.79   | 1.22  | 0.95  | 0.88  | 1.22  | 0.84 | 0.86                                                             | hypothetical protein                                             | Head5/YnfY family protein                         |
|  | Maa104-2258 (13E16) | MAV_2258:MAA1219                                          | 2,487                          | 3.32  |       |      |       |       |       |       |        | 4.19  |       |       |       |      | transposase, Mutator family protein                              | transposase, Mutator family protein                              |                                                   |
|  | INDEL8(MAV10)       | Maa104-2254 (13E19)                                       | MAV_2254:MAA1222               | 2,490 | 6.68  |      | 0.64  | 5.96  | 8.58  | 12.32 |        | 7.53  | 6.23  | 6.40  | 4.83  |      | hypothetical protein                                             | hypothetical protein                                             |                                                   |
|  | INDEL9(MAV9)        | Maa104-2223 (13F10)                                       | MAV_2223:MAA1251               | 2,518 | 13.84 |      |       | 31.72 | 29.88 | 21.98 | 13.77  | 26.13 | 21.90 | 17.51 | 13.16 |      | transposase, Mutator family protein                              | transposase, Mutator family protein                              |                                                   |
|  |                     | MapK10-2025c (6F9)                                        | pcic:MAP2025c:MAV_2164:MAA1306 | 2,576 | 1.09  | 0.60 | 0.89  | 0.85  | 2.51  | 0.69  | 0.75   | 0.83  | 1.09  | 1.31  | 1.12  | 1.02 | hypothetical protein                                             | 4-carboxymuconolactone decarboxylase domain protein              |                                                   |
|  |                     | MapK10-2026 (6F10)                                        | MAP2026:MAV_2162:MAA1307       | 2,578 | 0.99  | 0.70 | 0.79  | 0.81  | 1.61  | 0.73  | 0.52   | 0.60  | 2.04  | 3.69  | 1.70  | 1.06 | 1.02                                                             | hypothetical protein                                             | serine/threonine-protein kinase PtkE              |
|  |                     | MapK10-2027c (6F11)                                       | MAP2027c                       | 2,579 | 0.14  | 0.71 | 0.80  | 0.79  | 1.09  | 0.79  | 0.72   | 0.82  | 1.75  | 3.66  | 1.76  | 1.18 | 1.10                                                             | hypothetical protein                                             | hypothetical protein                              |
|  |                     | MapK10-2028c (6F12)                                       | MAP2028c                       | 2,580 | 0.18  | 0.71 | 0.81  | 1.35  | 0.89  | 0.82  | 0.89   | 1.60  | 3.34  | 1.74  | 1.15  | 1.04 | hypothetical protein                                             | hypothetical protein                                             |                                                   |
|  |                     | MapK10-2028c (6F13)                                       | MAP2028c                       | 2,581 | 0.31  | 0.66 | 0.80  | 0.79  | 1.28  | 0.76  | 0.70   | 0.84  | 1.34  | 2.87  | 1.60  | 1.12 | 1.12                                                             | hypothetical protein                                             | hypothetical protein                              |
|  |                     | MapK10-2030 (6F14)                                        | MAP2030:MAV_2159:MAA1311       | 2,584 | 1.26  | 0.61 | 0.88  | 0.85  | 1.20  | 0.77  | 0.51   | 0.61  | 1.24  | 2.87  | 1.71  | 1.03 | 1.09                                                             | hypothetical protein                                             | cytochrome P450 superfamily protein               |
|  |                     | MapK10-2031c (6F15)                                       | MAP2031c:MAV_2158:MAA1312      | 2,585 | 1.04  | 0.63 | 0.77  | 1.06  | 1.15  | 1.04  | 0.62   | 0.87  | 1.66  | 4.03  | 1.97  | 1.15 | 1.20                                                             | hypothetical protein                                             | serine/threonine-protein kinase                   |
|  |                     | MapK10-2038c (6F18)                                       | MAP2038c                       | 2,588 | 0.33  | 1.08 | 1.19  | 2.02  | 2.01  | 1.85  | 1.91   | 4.18  | 1.71  | 4.31  | 1.24  | 2.22 | hypothetical protein                                             | hypothetical protein                                             |                                                   |
|  |                     | MapK10-IRNAmh-2086c (6HMAP-IRNAmh-2086c:MAV_2095:MAA1369) | 2,647                          | 1.26  | 0.70  | 0.92 | 1.00  | 1.06  | 1.11  | 0.70  | 0.86   | 1.46  | 3.00  | 1.62  | 1.23  | 1.21 | 1.21                                                             | hypothetical protein                                             | hypothetical protein                              |
|  |                     | MapK10-2108 (6I21)                                        | MAP2108                        | 2,672 | 0.15  | 0.79 | 0.93  | 1.35  | 1.95  | 1.31  | 0.83   | 2.15  | 1.38  | 1.00  | 2.56  | 1.31 | 1.53                                                             | hypothetical protein                                             | hypothetical protein                              |
|  |                     | MapK10-2151 (6K17)                                        | MAP2151                        | 2,721 | 0.34  | 0.65 | 0.87  | 0.93  | 2.50  | 0.80  | 0.58   | 0.91  | 1.80  | 3.92  | 1.97  | 1.22 | 1.36                                                             | hypothetical protein                                             | hypothetical protein                              |
|  |                     | MapK10-2151:2152c (6K18)                                  | MAP2151:2152c                  | 2,722 | 0.17  | 0.61 | 0.81  | 1.24  | 2.61  | 0.67  | 0.61   | 0.75  | 2.57  | 4.04  | 1.17  | 1.25 | 1.16                                                             | hypothetical protein                                             | hypothetical protein                              |
|  |                     | MapK10-2152c (6K19)                                       | MAP2152c                       | 2,723 | 0.30  | 0.65 | 0.81  | 0.83  | 1.57  | 0.79  | 0.68   | 0.92  | 1.88  | 3.73  | 2.02  | 1.12 | 1.24                                                             | hypothetical protein                                             | hypothetical protein                              |
|  |                     | MapK10-2153 (6K20)                                        | MAP2153                        | 2,724 | 0.05  | 0.66 | 0.93  | 0.75  | 1.28  | 0.82  | 0.62   | 0.90  | 1.56  | 3.91  | 1.71  | 1.23 | 1.18                                                             | hypothetical protein                                             | hypothetical protein                              |
|  |                     | MapK10-2154c (6K21)                                       | MAP2154c                       | 2,725 | 0.06  | 0.71 | 0.80  | 0.81  | 1.31  | 1.05  | 0.60   | 0.75  | 1.25  | 4.17  | 1.90  | 1.23 | 1.13                                                             | hypothetical protein                                             | hypothetical protein                              |
|  |                     | MapK10-2154c (6K22)                                       | Spt10:MAP2155                  | 2,726 | 0.18  | 0.74 | 0.84  | 0.82  | 0.94  | 1.69  | 1.59   | 2.39  | 1.58  | 3.70  | 1.70  | 1.23 | 1.32                                                             | Spt10                                                            | hypothetical protein                              |
|  |                     | MapK10-2156 (6K23)                                        | MAP2156                        | 2,727 | 0.11  | 0.67 | 0.95  | 0.85  | 0.97  | 1.99  | 1.99   | 3.06  | 2.26  | 3.95  | 2.22  | 1.66 | 1.54                                                             | hypothetical protein                                             | hypothetical protein                              |
|  |                     | MapK10-2157 (6K24)                                        | MAP2157                        | 2,728 | 0.22  | 0.75 | 1.73  | 1.11  | 2.20  | 1.57  | 1.80   | 1.58  | 3.22  | 1.76  | 4.65  | 1.53 | 1.34                                                             | hypothetical protein                                             | hypothetical protein                              |
|  |                     | MapK10-2158 (6L11)                                        | MAP2158                        | 2,729 | 0.69  | 0.85 | 1.05  | 2.31  | 1.00  | 0.62  | 0.82   | 3.45  | 1.84  | 1.44  | 1.23  | 1.23 | hypothetical protein                                             | hypothetical protein                                             |                                                   |
|  |                     | MapK10-2156 (6L9)                                         | MAP2156:MAV_2018:MAA1437       | 2,737 | 0.88  | 0.85 | 1.13  | 0.89  | 1.05  | 1.79  | 1.34   | 1.83  | 0.36  | 1.29  | 1.36  | 1.10 | 1.23                                                             | hypothetical protein                                             | RNA polymerase ECF-subfamily protein sigma factor |
|  |                     | Maa104-2008 (13G12)                                       | MAV_2008:MAA1448               | 2,768 | 6.92  |      | 0.49  | 14.84 | 21.13 | 26.19 | 13.53  | 12.46 | 12.94 | 10.81 | 6.91  |      | 2,3-dihydroxybenzoate-AMP ligase                                 | 2,3-dihydroxybenzoate-AMP ligase                                 |                                                   |
|  |                     | Maa104-2007 (13G13)                                       | MAV_2007:MAA1449               | 2,769 | 7.12  |      | 0.89  | 11.68 | 14.69 | 21.15 | 48.73  | 20.54 | 13.85 | 14.30 | 11.95 |      | phospho-2-dehydro-3-deoxyheptonate aldolase                      | phospho-2-dehydro-3-deoxyheptonate aldolase                      |                                                   |
|  |                     | Maa104-2006 (13G14)                                       | MAV_2006:MAA1450               | 2,770 | 4.67  |      | 0.48  | 9.83  | 10.19 | 14.81 | 22.03  | 10.86 | 11.04 | 9.22  | 9.77  |      | PPE family protein                                               | PPE family protein                                               |                                                   |
|  |                     | Maa104-2005 (13G15)                                       | MAV_2005:MAA1451               | 2,771 | 6.16  |      |       | 27.73 | 28.89 | 46.91 | 136.35 | 29.84 | 26.00 | 21.18 | 21.55 |      | PapA2 protein                                                    | PapA2 protein                                                    |                                                   |
|  |                     | Maa104-2004 (13G16)                                       | MAV_2004:MAA1452               | 2,772 | 13.05 |      |       | 20.31 | 20.79 | 33.49 | 60.47  | 17.23 | 17.36 | 11.75 | 9.80  |      | ABC-2 type transporter                                           | ABC-2 type transporter                                           |                                                   |
|  |                     | Maa104-2001 (13G18)                                       | MAV_2001:MAA1454               | 2,774 | 3.76  |      | 0.56  | 13.87 | 11.58 | 16.64 | 7.59   | 9.15  | 7.91  | 6.73  | 5.57  |      | hypothetical protein                                             | hypothetical protein                                             |                                                   |
|  |                     | Maa104-2000 (13G19)                                       | MAV_2000:MAA1455               | 2,775 | 1.74  |      | 0.64  | 11.83 | 10.15 | 14.25 | 19.51  | 7.07  | 7.15  | 6.57  | 7.42  |      | hypothetical protein                                             | hypothetical protein                                             |                                                   |
|  |                     | Maa104-1998 (13G20)                                       | MAV_1998:MAA1456               | 2,776 | 3.72  | 0.44 | 0.94  | 5.07  | 5.87  | 5.74  | 5.98   | 6.84  | 3.10  | 3.57  | 2.92  | 2.10 |                                                                  | PPE family protein                                               | PPE family protein                                |
|  |                     | Maa104-1996 (13G21)                                       | MAV_1996:MAA1457               | 2,777 | 9.10  |      |       | 8.08  | 8.05  | 11.17 | 22.44  | 11.85 | 5.98  | 6.34  | 6.06  |      | hypothetical protein                                             | hypothetical protein                                             |                                                   |
|  |                     | Maa104-1995 (13G22)                                       | MAV_1995:MAA1458               | 2,778 | 7.35  |      | 0.71  | 11.13 | 10.15 | 14.25 | 19.51  | 7.07  | 7.15  | 6.57  | 7.42  |      | diarylate cyclase                                                | diarylate cyclase                                                |                                                   |
|  |                     | Maa104-1994 (13G23)                                       | MAV_1994:MAA1459               | 2,779 | 2.45  |      | 0.69  | 12.87 | 14.60 | 20.91 | 13.23  | 9.13  | 9.51  | 8.98  | 5.45  |      | hypothetical protein                                             | hypothetical protein                                             |                                                   |
|  |                     | Maa104-1993 (13G24)                                       | MAV_1993:MAA1460               | 2,780 | 2.21  |      |       | 15.07 | 19.73 | 37.07 | 45.18  | 11.17 | 13.25 | 11.62 | 9.19  |      | HspR protein                                                     | HspR protein                                                     |                                                   |
|  |                     | Maa104-1992 (13H1)                                        | MAV_1992:MAA1461               | 2,781 | 8.70  |      | 1.04  | 13.87 | 22.75 | 29.90 | 1.67   | 12.05 | 14.48 | 11.81 | 11.19 |      | hypothetical protein                                             | hypothetical protein                                             |                                                   |
|  |                     | Maa104-1990 (13H2)                                        | MAV_1990:MAA1462               | 2,782 | 4.90  |      |       | 7.82  | 8.12  | 7.86  | 10.51  | 2.97  | 8.70  | 7.18  | 6.95  | 6.21 |                                                                  | 18 kDa                                                           |                                                   |

|                      |                           |                           |       |       |      |      |      |      |      |      |      |      |      |      |      |                      |                                                |
|----------------------|---------------------------|---------------------------|-------|-------|------|------|------|------|------|------|------|------|------|------|------|----------------------|------------------------------------------------|
|                      | Mpk10-2577 (M18)          | MAP2577                   | 3.402 | 0.13  | 1.07 | 1.51 | 1.64 | 3.58 | 2.37 | 1.53 | 1.72 | 4.04 | 3.03 | 3.52 | 1.27 | 1.70                 | hypothetical protein                           |
|                      | Mpk10-2595 (N12)          | MAP2595.MAV_1329.MAA2068  | 3.420 | 0.90  | 0.91 | 0.89 | 3.76 | 0.99 | 1.13 | 1.04 | 1.14 | 1.05 | 0.94 | 0.83 | 0.86 | 1.08                 | hypothetical protein                           |
|                      | Mpk10-2626 (7020)         | MAP2626.MAV_1296.MAA2066  | 3.451 | 0.45  | 1.15 | 1.03 | 2.29 | 0.69 | 1.26 | 1.52 | 1.02 | 0.86 | 0.79 | 0.94 | 0.86 | 1.19                 | hypothetical protein                           |
|                      | Mpk10-2630c (7024)        | MAP2630c.MAV_1292.MAA2100 | 3.458 | 0.91  | 1.07 | 0.95 | 2.24 | 1.26 | 1.20 | 1.10 | 1.06 | 0.96 | 1.09 | 1.04 | 0.95 | 1.01                 | hypothetical protein                           |
|                      | Mpk10-2681c (8E8)         | MAP2681c                  | 3.518 | 1.70  | 0.71 | 0.81 | 0.82 | 1.04 | 0.65 | 0.48 | 0.67 | 1.26 | 3.72 | 1.57 | 1.07 | 1.13                 | hypothetical protein                           |
| INDEL11(LSP Type I)  | Mpk10-2704 (8E5)          | MAP2704.MAV_1210.MAA2178  | 3.541 | 1.03  | 1.05 | 1.01 | 1.09 | 0.88 | 0.35 | 0.29 | 0.20 | 1.11 | 0.88 | 0.90 | 0.93 | 0.84                 | hypothetical protein                           |
|                      | Mpk10-2705 (8E21)         | MAP2705                   | 3.607 | 0.70  | 0.92 | 0.77 | 1.01 | 1.21 | 0.82 | 0.56 | 0.72 | 1.33 | 3.34 | 1.92 | 1.07 | 1.17                 | hypothetical protein                           |
|                      | Mpk10-2768c (8E22)        | MAP2768c                  | 3.608 | 0.12  | 0.75 | 0.92 | 1.01 | 1.04 | 0.82 | 0.60 | 0.58 | 1.38 | 4.24 | 1.82 | 1.12 | 1.15                 | hypothetical protein                           |
|                      | Mpk10-2768c-2769c (8E23)  | MAP2768c-2769c            | 3.609 | 1.20  | 0.81 | 0.83 | 0.92 | 0.92 | 0.69 | 0.52 | 0.65 | 1.22 | 3.19 | 1.53 | 1.02 | 1.13                 | hypothetical protein                           |
|                      | Mpk10-2768c (8E24)        | MAP2768c                  | 3.610 | 1.14  | 0.85 | 0.79 | 0.99 | 1.14 | 0.82 | 0.68 | 0.80 | 1.40 | 3.35 | 1.77 | 1.07 | 1.20                 | hypothetical protein                           |
| Maa104-3533 (12H22)  | Maa104-3533 (12H22)       | MAV_3533.MAA0035          | 3.613 |       |      |      |      |      |      |      |      |      |      |      |      |                      | transposase                                    |
|                      | Maa104-3535 (12H21)       | MAV_3535.MAA0034          | 3.614 |       |      |      |      |      |      |      |      |      |      |      |      |                      | transposase, Mutator family protein            |
|                      | Maa104-3648 (15D14)       | MAV_3648.MAA4819          | 3.727 |       |      |      |      |      |      |      |      |      |      |      |      |                      | hypothetical protein                           |
|                      | Maa104-3798 (15C18)       | MAV_3798.MAA4679          | 3.853 |       |      |      |      |      |      |      |      |      |      |      |      |                      | hypothetical protein                           |
|                      | Maa104-3955a (15B12)      | MAV_3955a.MAA4497         | 4.081 | 1.45  | 0.85 | 0.87 | 0.91 | 1.22 | 0.99 | 0.71 | 0.89 | 1.35 | 3.28 | 1.44 | 0.91 | 1.20                 | nucleic acid hydrolase                         |
| INDEL12(MAV21)       | Maa104-4125 (15B2)        | MAV_4125.MAA4377          | 4.215 | 2.55  |      |      |      |      |      |      |      |      |      |      |      |                      | virulence factor Mce family protein            |
|                      | Maa104-4128 (15B1)        | MAV_4128.MAA4374          | 4.218 | 5.39  |      |      |      |      |      |      |      |      |      |      |      |                      | hypothetical protein                           |
|                      | Maa104-4130 (15A24)       | MAV_4130.MAA4373          | 4.219 | 4.05  |      |      |      |      |      |      |      |      |      |      |      |                      | immunogenic protein MPT64                      |
|                      | Mpk10-3373 (9C10)         | MAP3373                   | 4.314 | 0.66  | 0.82 | 0.62 | 1.50 | 2.71 | 1.06 | 0.74 | 1.80 | 2.86 | 3.91 | 1.55 | 1.05 | 1.03                 | hypothetical protein                           |
|                      | Mpk10-3460c (10C1)        | MAP3460c                  | 4.411 | 0.63  | 0.80 | 0.93 | 1.04 | 2.10 | 0.48 | 0.35 | 0.26 | 1.36 | 1.15 | 0.92 | 1.00 | 0.93                 | hypothetical protein                           |
| INDEL13              | Mpk10-3480 (10C21)        | MAP3480                   | 4.432 | 0.16  | 0.73 | 0.94 | 1.06 | 1.39 | 1.75 | 1.51 | 1.62 | 2.04 | 2.09 | 4.71 | 1.14 | 1.07                 | hypothetical protein                           |
|                      | Maa104-4351 (14P22)       | MAV_4351.MAA4164          | 4.445 | 5.00  |      |      |      |      |      |      |      |      |      |      |      |                      | putative HT1-type transcriptional regulator    |
|                      | Maa104-4353 (14P22)       | MAV_4353.MAA4163          | 4.447 | 6.76  |      |      |      |      |      |      |      |      |      |      |      |                      | alpha-ketoglutarate-dependent isomerase        |
| INDEL15(LSP Type II) | Mpk10-3584 (10G5)         | MAP3584.MAV_5129.MAA3444  | 4.542 | 1.11  | 1.09 | 1.03 | 1.05 | 0.94 | 1.32 | 0.93 | 0.75 | 0.39 | 0.30 | 0.32 | 0.28 | 0.27                 | hypothetical protein                           |
|                      | Maa104-5108 (14K16)       | MAV_5108.MAA3464          | 4.581 | 16.21 |      |      |      |      |      |      |      |      |      |      |      |                      | transcriptional regulator, ArsR family protein |
|                      | Maa104-5108 (14K18)       | MAV_5108.MAA3466          | 4.583 | 11.24 |      |      |      |      |      |      |      |      |      |      |      |                      | phosphoenolpyruvate carboxylase                |
|                      | Maa104-5181 (14L17)       | MAV_5181.MAA3491          | 4.586 | 39.90 |      |      |      |      |      |      |      |      |      |      |      |                      | acetyl-CoA acyltransferase                     |
|                      | Maa104-5074 (14L23)       | MAV_5074.MAA3497          | 4.592 | 31.63 |      |      |      |      |      |      |      |      |      |      |      |                      | citrate lyase                                  |
| Mpk10-5026 (14N13)   | Mpk10-5026 (14N13)        | MAV_5026.MAA3538          | 4.630 | 22.13 |      |      |      |      |      |      |      |      |      |      |      |                      | hypothetical protein                           |
|                      | Mpk10-3537c (10J10)       | MAP3537c.MAV_4973.MAA3589 | 4.684 | 1.11  | 1.11 | 0.98 | 2.09 | 1.20 | 0.92 | 0.88 | 0.82 | 1.33 | 0.91 | 0.81 | 0.92 | 1.00                 | MmpL11                                         |
|                      | Mpk10-3730 (10N8)         | MAP3730                   | 4.785 | 0.02  | 0.74 | 0.74 | 0.88 | 1.31 | 0.68 | 0.62 | 0.72 | 1.42 | 4.09 | 2.31 | 1.20 | 1.29                 | hypothetical protein                           |
|                      | Mpk10-3731c (10N9)        | MAP3731c                  | 4.786 | 0.01  | 0.77 | 0.89 | 0.95 | 2.66 | 0.94 | 0.71 | 1.02 | 2.56 | 4.28 | 1.97 | 1.28 | 1.17                 | hypothetical protein                           |
|                      | Mpk10-3732c (10N10)       | MAP3732c                  | 4.787 | 0.01  | 0.73 | 0.76 | 0.91 | 2.03 | 0.90 | 0.44 | 0.84 | 3.02 | 4.52 | 2.13 | 1.28 | 1.18                 | hypothetical protein                           |
| Mpk10-3732c (10N11)  | Mpk10-3732c (10N11)       | MAP3732c                  | 4.788 | 0.01  | 0.73 | 0.79 | 0.91 | 1.25 | 0.91 | 0.75 | 0.91 | 1.77 | 1.94 | 1.91 | 1.14 | 1.15                 | hypothetical protein                           |
|                      | Mpk10-3734c (10N12)       | MAP3734c                  | 4.789 | 0.02  | 0.72 | 0.85 | 0.97 | 1.32 | 0.89 | 0.53 | 0.74 | 1.51 | 3.87 | 1.89 | 1.11 | 1.14                 | hypothetical protein                           |
|                      | Mpk10-3735c (10N13)       | MAP3735c                  | 4.790 | 0.02  | 0.67 | 0.88 | 0.73 | 1.33 | 0.78 | 0.39 | 0.64 | 1.45 | 4.81 | 2.26 | 1.14 | 1.24                 | hypothetical protein                           |
|                      | Mpk10-3736c (10N14)       | MAP3736c                  | 4.791 | 0.07  | 0.85 | 0.78 | 0.82 | 0.66 | 0.69 | 0.63 | 0.68 | 3.29 | 1.63 | 1.01 | 1.06 | hypothetical protein |                                                |
|                      | Mpk10-3737 (10N15)        | MAP3737                   | 4.792 | 0.06  | 0.84 | 0.77 | 1.11 | 0.81 | 0.68 | 0.71 | 0.88 | 1.12 | 2.16 | 1.28 | 0.94 | 0.95                 | hypothetical protein                           |
|                      | Mpk10-3738c (10N16)       | MAP3738c                  | 4.793 | 0.03  | 0.91 | 0.89 | 1.09 | 1.28 | 0.81 | 0.71 | 0.65 | 1.39 | 3.38 | 2.19 | 1.14 | 1.15                 | hypothetical protein                           |
|                      | Mpk10-3738c (10N17)       | MAP3738c                  | 4.794 | 0.05  | 0.78 | 0.91 | 1.34 | 1.95 | 0.66 | 0.55 | 0.76 | 2.93 | 3.28 | 1.70 | 1.13 | 1.20                 | hypothetical protein                           |
|                      | Mpk10-3738c (10N18)       | MAP3738c                  | 4.795 | 0.07  | 0.83 | 0.89 | 1.06 | 1.16 | 0.99 | 0.77 | 1.06 | 2.12 | 3.62 | 1.70 | 1.13 | 1.11                 | hypothetical protein                           |
|                      | Mpk10-3740 (10N18)        | MAP3740                   | 4.796 | 0.02  | 0.81 | 0.97 | 0.83 | 1.33 | 0.92 | 0.72 | 0.87 | 1.90 | 2.42 | 1.46 | 1.01 | 1.05                 | hypothetical protein                           |
|                      | Mpk10-3741 (10N19)        | MAP3741                   | 4.797 | 0.02  | 0.75 | 0.89 | 0.88 | 1.18 | 0.90 | 0.67 | 0.93 | 1.52 | 2.55 | 1.63 | 1.08 | 1.15                 | hypothetical protein                           |
|                      | Mpk10-3742 (10N20)        | MAP3742                   | 4.798 | 0.01  | 0.74 | 0.77 | 0.90 | 1.24 | 0.79 | 0.53 | 0.66 | 1.31 | 2.91 | 1.73 | 1.03 | 1.07                 | hypothetical protein                           |
|                      | Mpk10-3743 (10N21)        | MAP3743                   | 4.799 | 0.01  | 0.77 | 0.92 | 0.98 | 1.16 | 0.93 | 0.69 | 0.80 | 1.64 | 3.00 | 1.80 | 1.15 | 1.15                 | hypothetical protein                           |
|                      | Mpk10-3744 (10N22)        | MAP3744                   | 4.800 | 0.03  | 0.73 | 0.73 | 0.82 | 1.08 | 0.88 | 0.43 | 0.60 | 1.43 | 4.00 | 1.96 | 1.10 | 1.12                 | hypothetical protein                           |
|                      | Mpk10-3745 (10N23)        | MAP3745                   | 4.801 | 0.02  | 0.74 | 0.80 | 0.84 | 0.99 | 0.86 | 0.53 | 0.70 | 1.64 | 3.82 | 1.75 | 1.08 | 1.23                 | hypothetical protein                           |
|                      | Mpk10-3746 (10N24)        | MAP3746                   | 4.802 | 0.03  | 0.79 | 0.77 | 0.85 | 1.25 | 0.67 | 0.51 | 0.71 | 1.26 | 4.29 | 2.31 | 1.31 | 1.27                 | hypothetical protein                           |
|                      | Mpk10-3747c (10D1)        | MAP3747c                  | 4.803 | 0.06  | 0.67 | 0.86 | 0.80 | 2.93 | 0.90 | 0.72 | 1.01 | 3.41 | 4.33 | 1.80 | 1.19 | 1.19                 | hypothetical protein                           |
|                      | Mpk10-3748c (10C2)        | IS110.MAP3748c            | 4.804 | 0.04  | 0.71 | 0.92 | 0.83 | 2.03 | 0.97 | 0.78 | 0.80 | 2.24 | 3.20 | 1.68 | 1.13 | 1.08                 | IS110 transposase                              |
|                      | Mpk10-3749 (10D3)         | MAP3749                   | 4.805 | 0.24  | 0.73 | 0.89 | 0.77 | 1.33 | 1.09 | 0.61 | 0.86 | 1.79 | 3.51 | 1.73 | 1.07 | 1.08                 | hypothetical protein                           |
|                      | Mpk10-3750 (10D4)         | mmrS1.MAP3750             | 4.806 | 0.14  | 0.66 | 0.84 | 0.62 | 1.32 | 1.03 | 0.49 | 0.75 | 1.43 | 3.80 | 1.77 | 1.11 | 1.21                 | MmrS1                                          |
|                      | Mpk10-3751 (10D5)         | mmrL4.5.MAP3751           | 4.807 | 0.28  | 0.73 | 0.78 | 0.85 | 0.92 | 0.85 | 0.57 | 0.78 | 1.14 | 3.91 | 1.65 | 0.98 | 1.03                 | MmrL4.5                                        |
| Mpk10-3752 (10D6)    | fadD28.MAP3752            | 4.808                     | 0.15  | 0.65  | 0.83 | 0.87 | 1.04 | 0.90 | 0.60 | 0.84 | 1.41 | 3.89 | 1.78 | 1.12 | 1.24 | acyl-CoA synthase    |                                                |
| Mpk10-3753 (10D7)    | MAP3753                   | 4.809                     | 0.30  | 0.71  | 0.76 | 0.86 | 1.04 | 0.75 | 0.50 | 0.71 | 1.54 | 3.78 | 1.81 | 1.16 | 1.05 | hypothetical protein |                                                |
| Mpk10-3754 (10D9)    | MAP3754                   | 4.810                     | 0.08  | 0.73  | 0.77 | 0.88 | 1.25 | 0.89 | 0.60 | 0.70 | 1.65 | 3.76 | 2.25 | 1.34 | 1.39 | hypothetical protein |                                                |
| Mpk10-3755 (10D9)    | MAP3755                   | 4.811                     | 0.07  | 0.69  | 0.83 | 1.02 | 2.46 | 1.10 | 0.86 | 1.16 | 2.35 | 3.34 | 2.08 | 1.26 | 1.19 | hypothetical protein |                                                |
| Mpk10-3756c (10D10)  | MAP3756c                  | 4.812                     | 0.05  | 0.63  | 0.75 | 0.90 | 2.58 | 1.01 | 0.52 | 0.89 | 2.51 | 3.93 | 2.24 | 1.23 | 1.21 | hypothetical protein |                                                |
| Mpk10-3757c (10D11)  | MAP3757c                  | 4.813                     | 0.21  | 0.74  | 0.94 | 0.95 | 1.21 | 1.14 | 0.86 | 1.00 | 1.85 | 3.26 | 1.78 | 1.13 | 1.17 | hypothetical protein |                                                |
| Mpk10-3758c (10D12)  | MAP3758c                  | 4.814                     | 0.30  | 0.70  | 0.79 | 0.92 | 1.15 | 0.87 | 0.75 | 0.87 | 1.62 | 3.87 | 1.69 | 1.14 | 1.14 | hypothetical protein |                                                |
| Mpk10-3758c (10D13)  | MAP3758c.MAV_4319.MAA4197 | 4.815                     | 1.65  | 0.63  | 0.79 | 0.99 | 1.17 | 0.71 | 0.43 | 0.54 | 1.46 | 1.90 | 1.48 | 1.19 | 1.16 | hypothetical protein |                                                |
| Mpk10-3760c (10D14)  | MAP3760c                  | 4.816                     | 0.88  | 0.70  | 0.92 | 0.73 | 0.89 | 0.67 | 0.52 | 0.57 | 1.30 | 3.14 | 1.53 | 1.24 | 1.13 | hypothetical protein |                                                |
| Mpk10-3761c (10D15)  | MAP3761c                  | 4.817                     | 0.52  | 0.72  | 0.81 | 0.84 | 1.00 | 0.88 | 0.54 | 0.79 | 1.42 | 3.54 | 1.73 | 1.16 | 1.13 | hypothetical protein |                                                |
| Mpk10-3762c (10D16)  | MAP3762c                  | 4.818                     | 0.18  | 0.69  | 0.86 | 0.97 | 1.51 | 1.08 | 0.54 | 0.68 | 1.38 | 5.20 | 2.45 | 1.24 | 1.34 | hypothetical protein |                                                |
| Mpk10-3763c (10D17)  | papA3.2.MAP3763c          | 4.819                     | 0.08  | 0.77  | 0.84 | 0.83 | 2.74 | 0.92 | 0.61 | 0.73 | 3.42 | 4.07 | 1.86 | 1.12 | 1.10 | PapA3.2              |                                                |
| Mpk10-3764c (10D18)  | pls2.MAP3764c             | 4.820                     | 0.11  | 0.86  | 1.00 | 0.77 | 1.65 | 1.05 | 0.92 | 1.05 | 1.96 | 1.58 | 1.45 | 1.02 | 1.21 | Pls2                 |                                                |
| Mpk10-3765 (10D19)   | MAP3765                   | 4.821                     | 0.32  | 0.81  | 1.00 | 0.89 | 1.13 | 0.98 | 0.77 | 0.74 | 1.22 | 2.70 | 1.29 | 1.12 | 1.00 | hypothetical protein |                                                |
| Mpk10-3766 (10D20)   | MAP3766                   | 4.822                     |       |       |      |      |      |      |      |      |      |      |      |      |      |                      |                                                |

MapK10-4333-4334 (12G16) MAP4333-4334  
MaapVT2-P2 (15D24) pVT2-P2

5,450 0.23 0.79 0.93 1.10 1.39 0.85 0.48 0.80 1.06 3.35 1.96 1.15 1.52  
5,472

putative relaxase
